# Supplementary material for: Novel genetic variants associated with mortality after unrelated donor allogeneic hematopoietic cell transplantation
Source: PubMed Central journal article supplement — eClinicalMedicine. 2021 Aug 25;40:101093. doi: 10.1016/j.eclinm.2021.101093 (PMC8548922; doi:10.1016/j.eclinm.2021.101093), 2021-08-25

## Supplemental Methods

SNP associations were placed in context of previous GWAS using PhenoScanner, a variant-phenotype comprehensive database of large GWAS, which includes results from the NHGRI-EBI GWAS catalogue, the UK Biobank, NIH Genome-Wide Repository of Associations between SNPs and Phenotypes and publicly available summary statistics from more than 150 published GWAS.<sup>1</sup> Publicly available results for all phenotypes were filtered at  $P < 5 \times 10^{-8}$  and the R statistical software package phenoScanner was used to download the data for all significant variants.<sup>2</sup>

SNP data were integrated with Hi-C cell line data and visualized using Hi-C plots to determine significant regions of interaction.<sup>3</sup> Chromatin state data based on 25-state Imputation Based Chromatin State Model across 24 Blood, T-cell, HSC and B-cell lines was downloaded from the Roadmap Epigenomics project.<sup>4</sup> Figures including chromatin state information, eQTL associations, CADD scores, RegulomeDB scores and previous GWAS hits were constructed using the R Bioconductor package gviz and FUMA.<sup>5-7</sup>

All significant regions were further examined in the context of topologically associating domains (TADs).<sup>8,9</sup> TADs are self-interacting megabase-long genomic regions that contain interacting *cis*-regulatory elements and target genes; TADs often contain clusters of genes that interact with each other. TAD boundaries are the regions between TADs that restrict interactions of *cis*-regulatory sequences (such as enhancers) to target genes. Recent evidence shows that GWAS of genetic variation in TAD boundaries contributes to complex trait heritability, especially for immunologic, hematologic, and metabolic traits.<sup>9</sup> We used TAD maps across 37 diverse cell types to determine if associated loci were in TADs or TAD boundaries.<sup>10</sup> Lastly, Multi-marker Analysis of GenoMic Annotation (MAGMA) v8 as implemented in FUMA was used to perform genome-wide gene-level associations with OS, TRM and DRM.<sup>11</sup>

1. Kamat MA, Blackshaw JA, Young R, *et al.*, PhenoScanner V2: an expanded tool for searching human genotype-phenotype associations. *Bioinformatics* 2019; **35**: 4851-4853.
2. Staley, JR, Blackshaw J, Kamat MA, *et al.*, PhenoScanner: a database of human genotype-phenotype associations. *Bioinformatics* 2016; **32**: 3207-3209.
3. Yu Y, Ouyang Y, Yao W. shinyCircos: an R/Shiny application for interactive creation of Circos plot. *Bioinformatics* 2018; **34**: 1229-1231.
4. Roadmap Epigenomics Consortium. Integrative analysis of 111 reference human epigenomes. *Nature* 2015; **518**: 317-330.

5. Cairns J., Freire-Pritchett P, Wingett SW, *et al.*, CHiCAGO: robust detection of DNA looping interactions in Capture Hi-C data. *Genome Biol* 2016; **17**: 127.
6. Mifsud B, Tavares-Cadete F, Young AN, *et al.*, Mapping long-range promoter contacts in human cells with high-resolution capture Hi-C. *Nat Genet* 2015; **47**: 598-606.
7. Spurrell CH, Dickel DE, Visel A. The Ties That Bind: Mapping the Dynamic Enhancer-Promoter Interactome. *Cell* 2016; **167**: 1163-1166.
8. Dixon JR, Gorkin DU, Ren B. Chromatin Domains: The Unit of Chromosome Organization. *Mol Cell* 2016; **62**: 668-680.
9. MacArthur E, Capra J. Topologically associating domain boundaries that are stable across diverse cell types are evolutionarily constrained and enriched for heritability. *Am J Hum Genet* 2021; **108**: P269-283.
10. Dixon JR, Selvaraj S, Yue F, *et al.*, Topological domains in mammalian genomes identified by analysis of chromatin interactions. *Nature* 2012; **485**: 376-380.
11. de Leeuw CA, Mooij JM, Heskes T, Posthuma D. MAGMA: generalized gene-set analysis of GWAS data. *PLoS Comput Biol* 2015; **11**: e1004219.

**Supplemental Figure 1. Genotyping, Imputation and Quality Control**  
 Sample sizes available for analysis following quality control

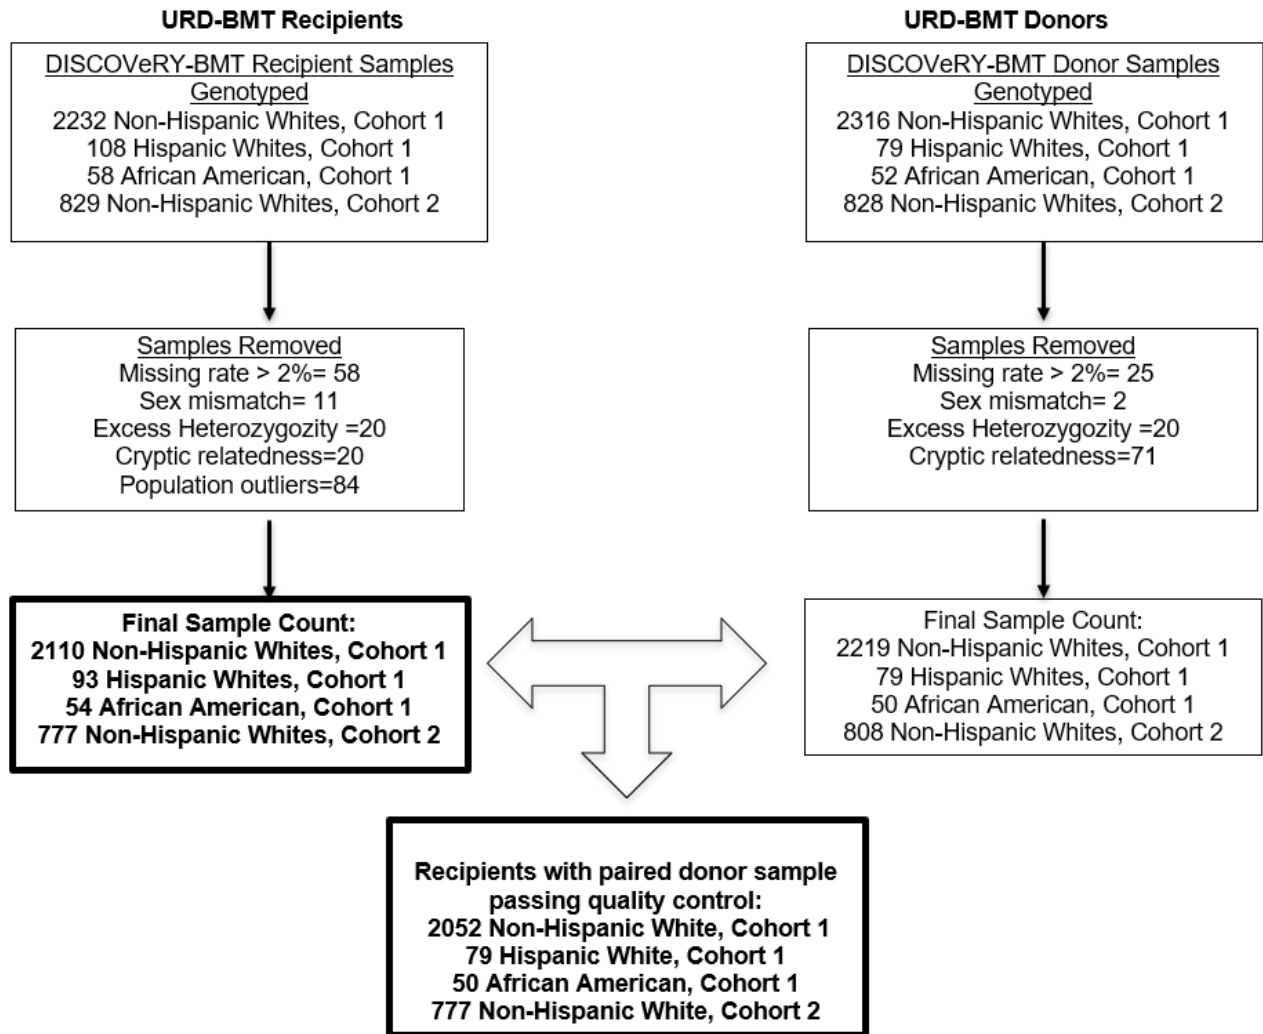

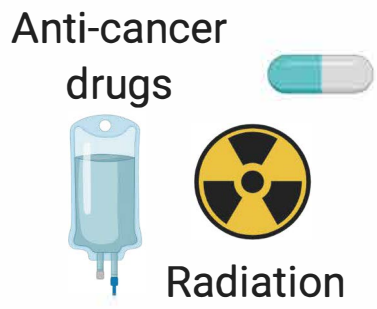

Pre-transplant  
AML, MDS and  
ALL patients

Healthy unrelated  
8/8 HLA matched  
BMT donors, >18 y

### Allogeneic BMT donor-recipient pairs

**Cohort 1:** 2111 non-hispanic  
EAs, 125 EA Hispanics, 54  
African Americans, 34 Asian  
Americans

**Cohort 2:** 779 non-hispanic  
EAs, 62 Hispanic EAs,  
25 African Americans,  
17 Asian Americans

### Genotyping and Phenotyping

Genotyping

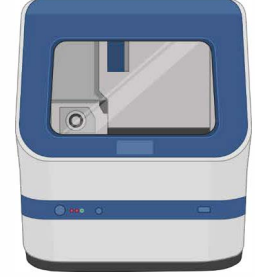

OmniExpress

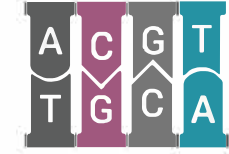

SNPs & SNVs

Survival data  
one year  
post-BMT (OS,  
DRM and TRM)

QC and Genotype Imputation w/HRC

### Fine-mapping, annotation & Bioinformatic analyses

-Fine mapping- Approx.  
Bayes Factor (w/ Coloc)

-Roadmap  
Epigenome  
Hi-C analyses

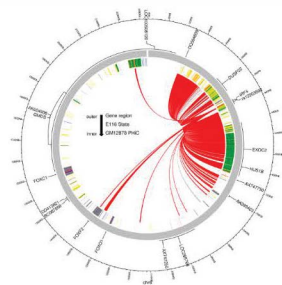

-gene-based analyses (MAGMA),  
CADD scores, regulomedb scores,  
eQTLs, pQTLs (additional FUMA  
annotation)

### Genome wide survival analysis

European Americans Cohorts  
1 & 2 w/gwasurvivr: donor  
genome, recipient genome, donor-  
recipient allele mismatch

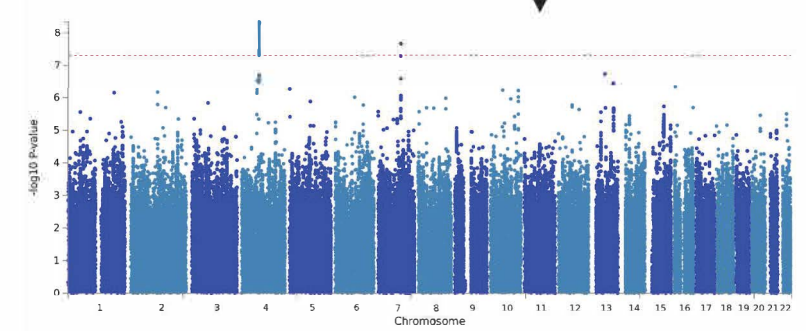

Meta-analysis of Cohorts 1 and 2  
(~9M variants)

### Supplemental Figure 2.

Work flow and study  
design of DISCOVeRY-  
BMT study

### Supplemental Figure 3. Q-Q plots of SNP association by cohort 1, cohort 2 and overall survival

Observed p-values for all SNPs are plotted in grey against expected p-values for meta-analysis. From left to right, cohort 1, cohort 2 and meta-analysis. The top row are qqplots of p-values from recipient associations with overall survival, the middle row are qqplots of p-values for donor associations with OS, the bottom row are qqplots of p-values for donor-recipient mismatch associations with OS.

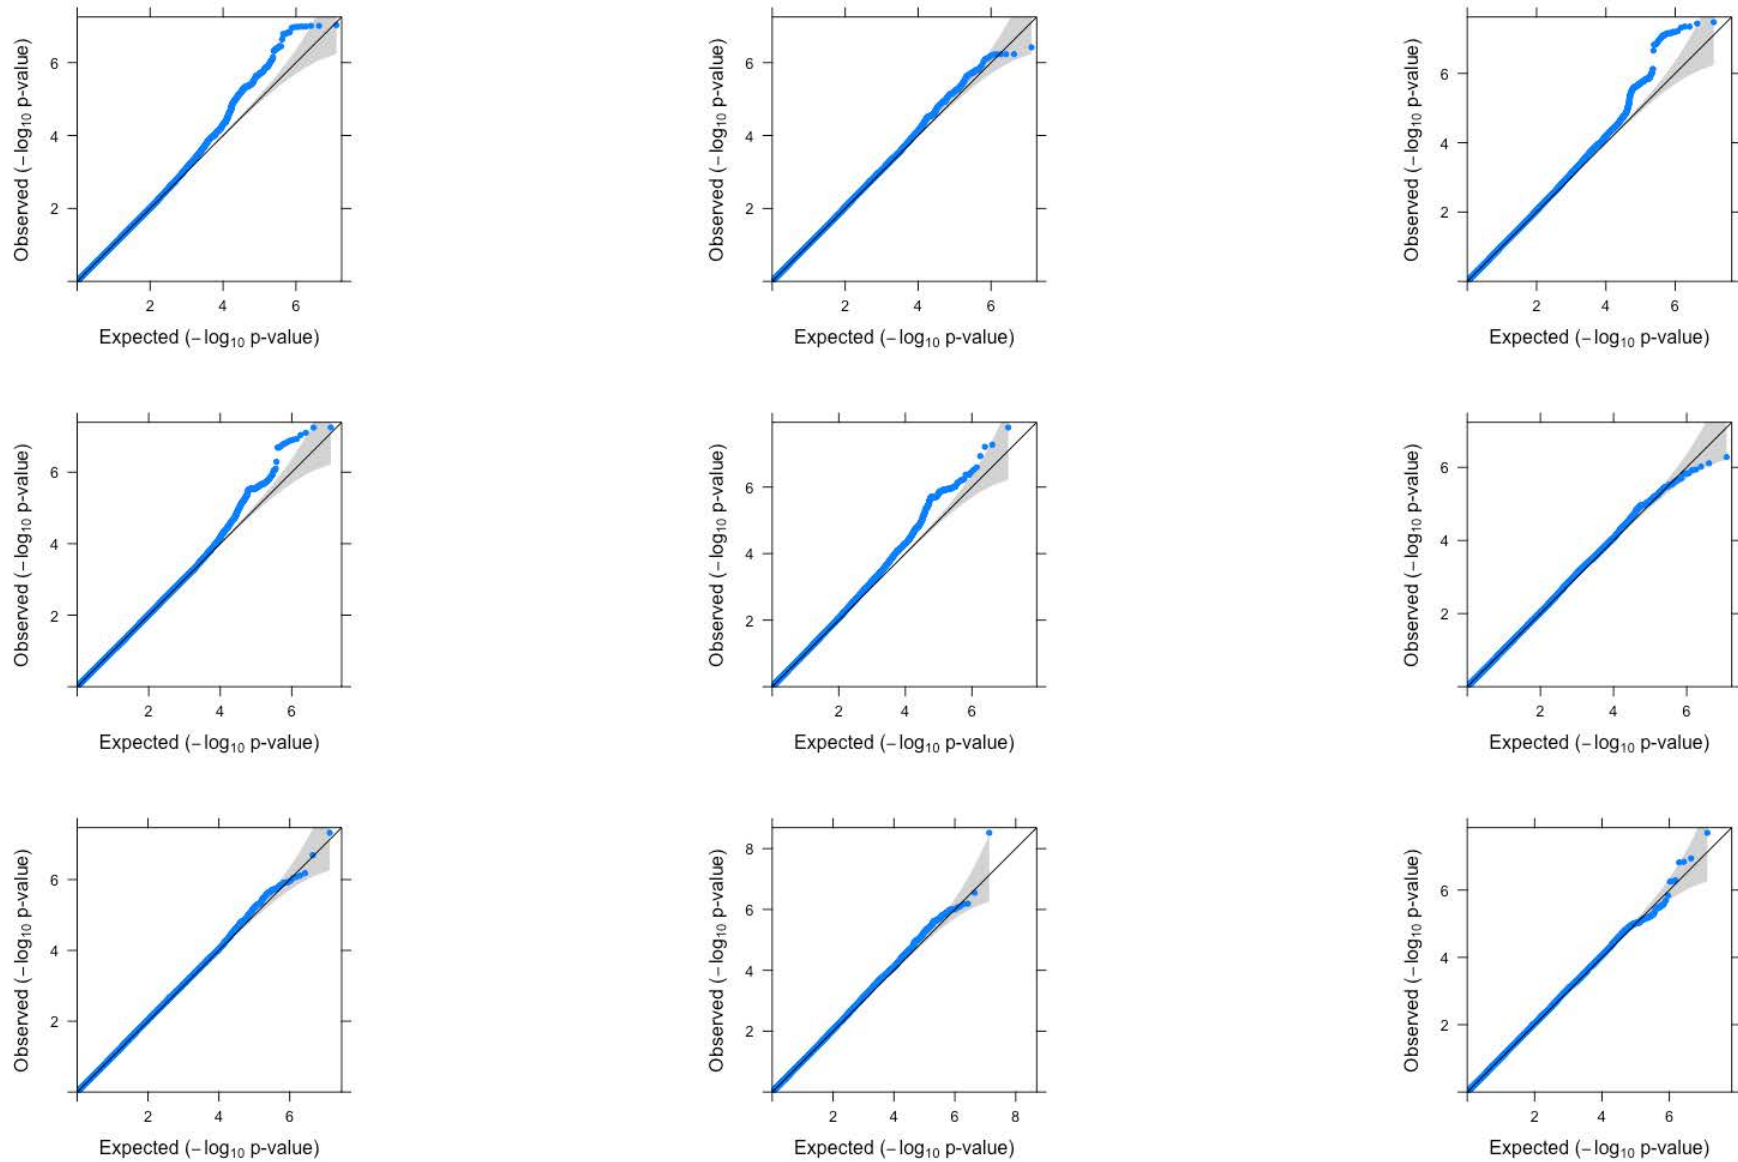

**Supplemental Figure 4. One-year survival curves by genotype for rs9990017**

A) Cohort 1 B) Cohort 2 and C) Cohorts 1 and 2 combined

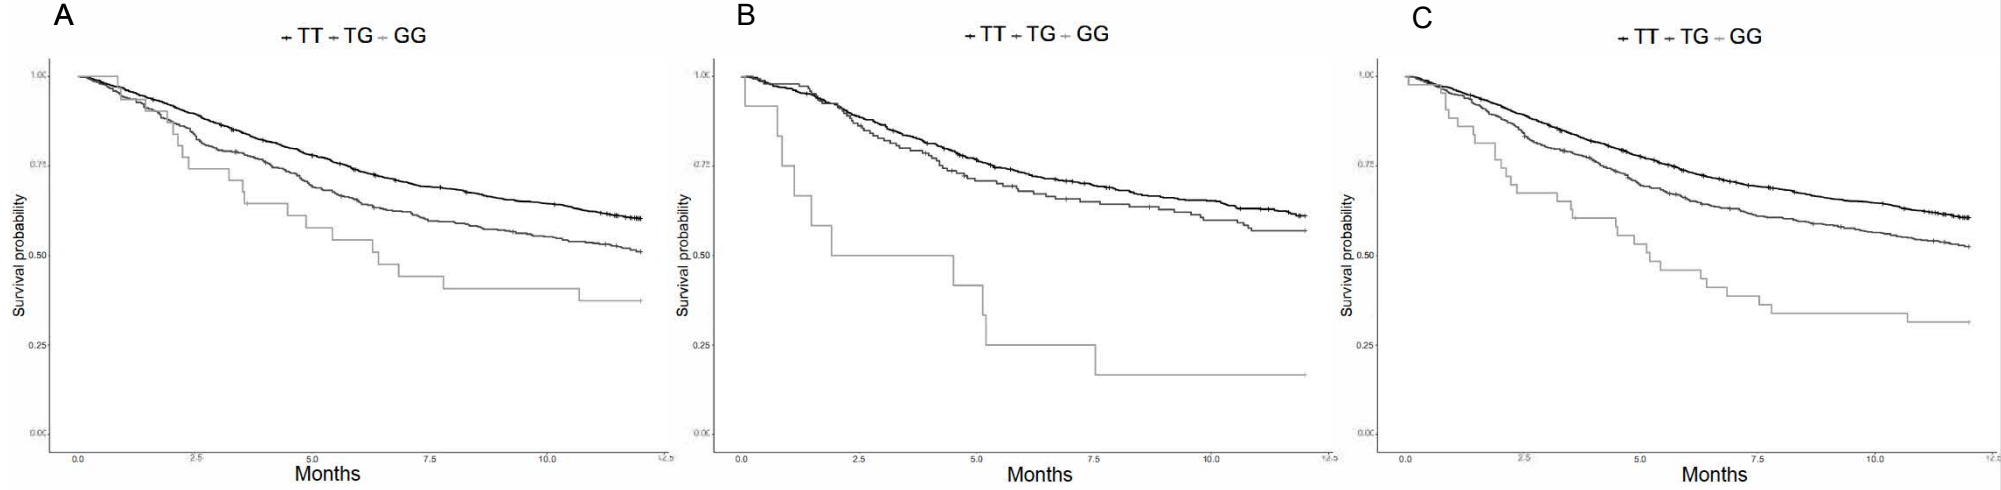

### **Supplemental Figure 5. OS regional association plot of allele mismatch in Chromosome 1**

Regional plot of the chromosome 1 associated locus with, from the top, GWAS  $P$ -value (SNPs are colored based on  $r^2$ ), CADD score, RegulomeDB score and eQTL  $P$ -value across multiple datasets. eQTLs are plotted per gene and colored based on tissue types. In the plots of CADD score, RegulomeDB score and eQTLs, SNPs which are not in LD with the lead SNP are colored gray. 15-core chromatin states for Blood and T-cells are shown with the states color-coded and shown in the legend at the far right. Significant Hi-C data loops across 21 tissues from GSE87112 are shown at the bottom, these are re-processed data (output of Fit-Hi-C) from <https://www.ncbi.nlm.nih.gov/geo/query/acc.cgi?acc=GSE87112>

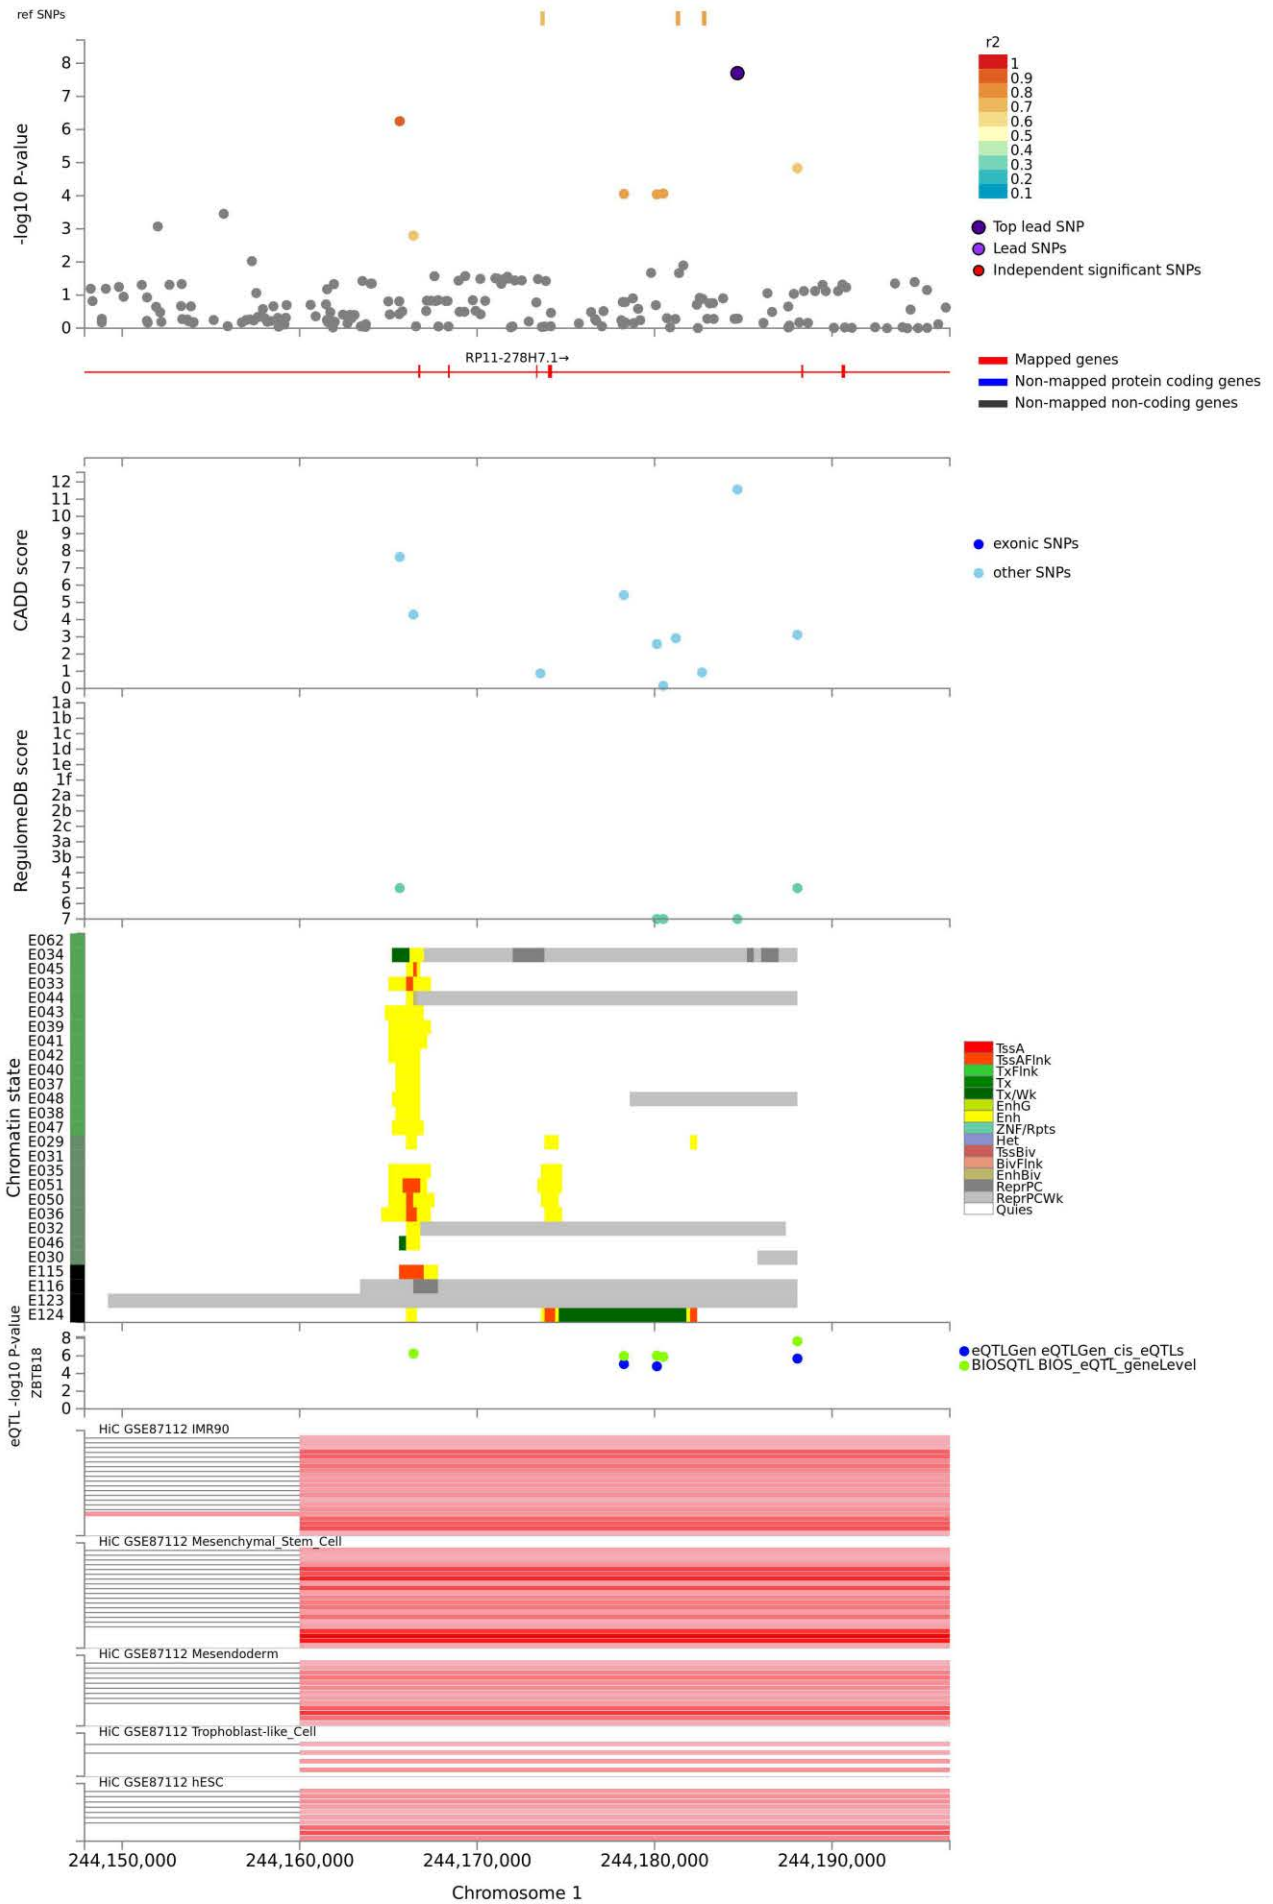



### Supplemental Figure 6. Q-Q plot of donor associations with DRM

Observed p-values for all SNPs are plotted in grey against expected p-values for meta-analysis.

From left to right, cohort 1, cohort 2 and meta-analysis. The top row are qqplots of p-values from recipient associations with disease-related mortality (DRM), the middle row are qqplots of p-values for donor associations with DRM, the bottom row are qqplots of p-values for donor-recipient mismatch associations with DRM.

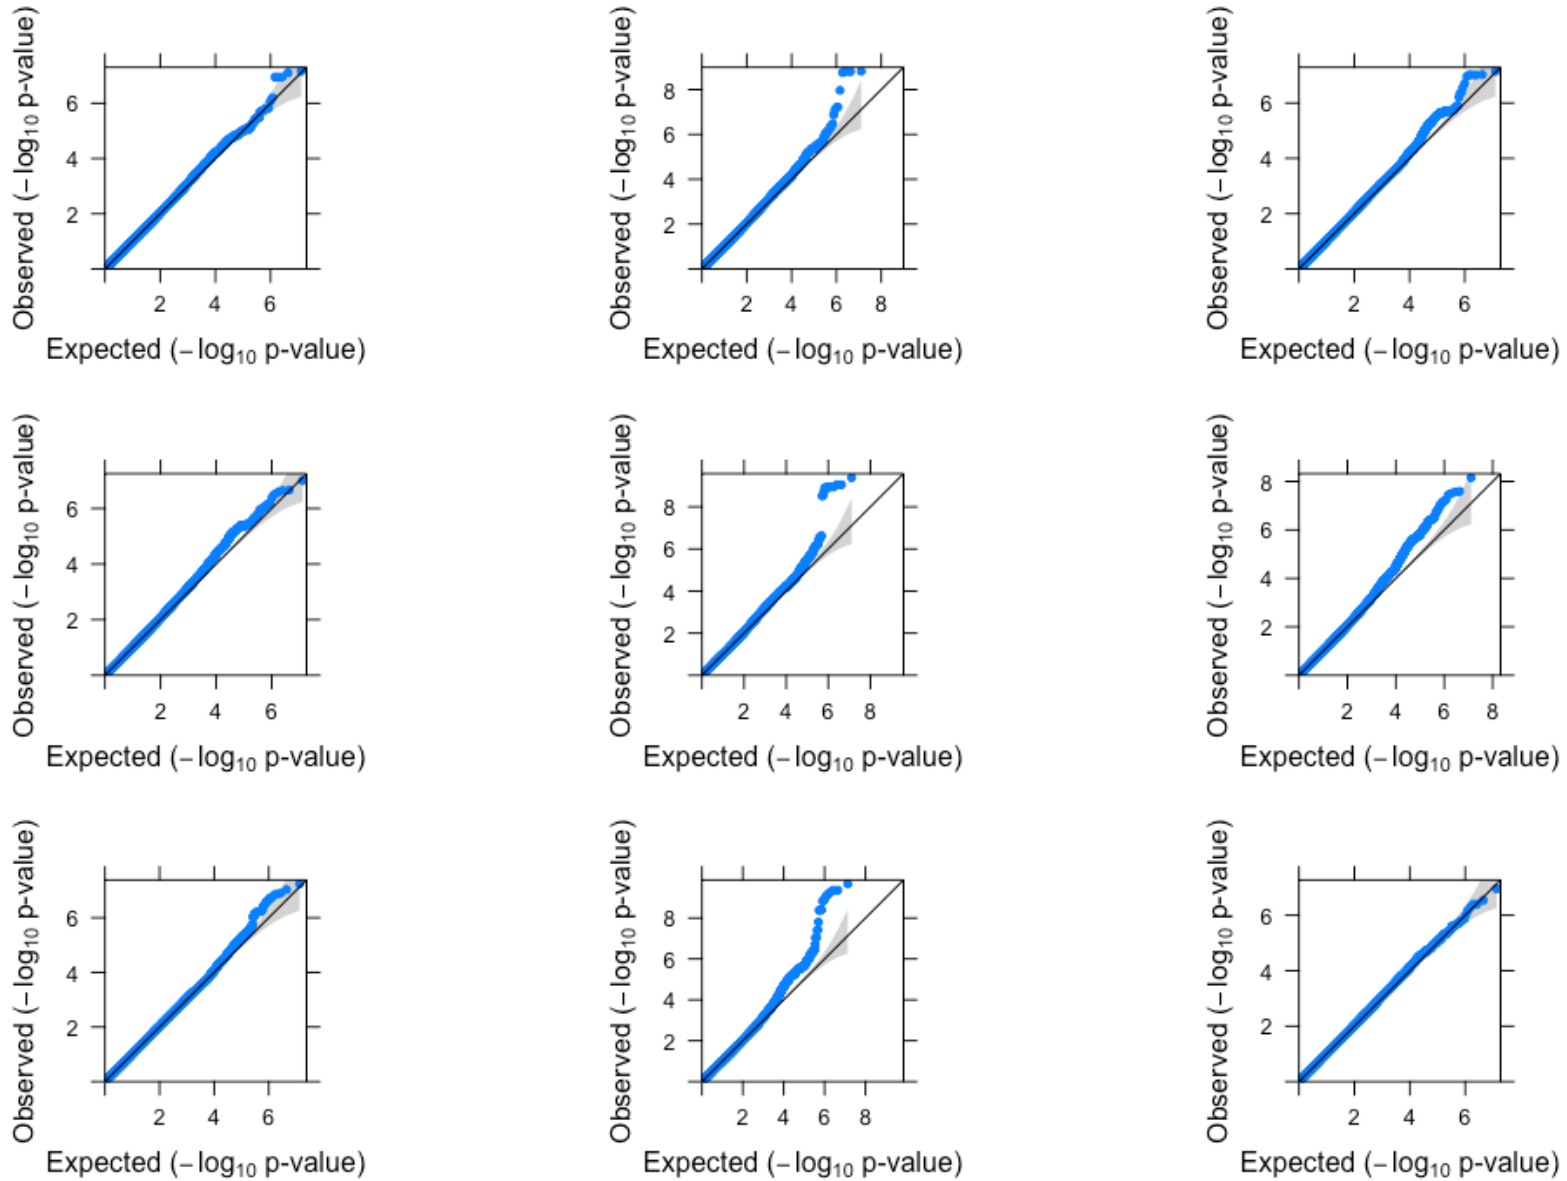

**Supplemental Figure 7. DRM regional association plot of donor chromosome 14 *PCNXL4* region**

Regional plot of the chromosome 14 associated locus with, from the top, GWAS *P*-value (SNPs are colored based on  $r^2$ ), CADD score, RegulomeDB score and eQTL *P*-value across multiple datasets. eQTLs are plotted per gene and colored based on tissue types. In the plots of CADD score, RegulomeDB score and eQTLs, SNPs which are not in LD with the lead SNP are colored gray. 15-core chromatin states for Blood and T-cells are shown with the states color-coded and shown in the legend at the far right. Significant Hi-C data loops across 21 tissues from GSE87112 are shown at the bottom, these are re-processed data (output of Fit-Hi-C) from <https://www.ncbi.nlm.nih.gov/geo/query/acc.cgi?acc=GSE87112>

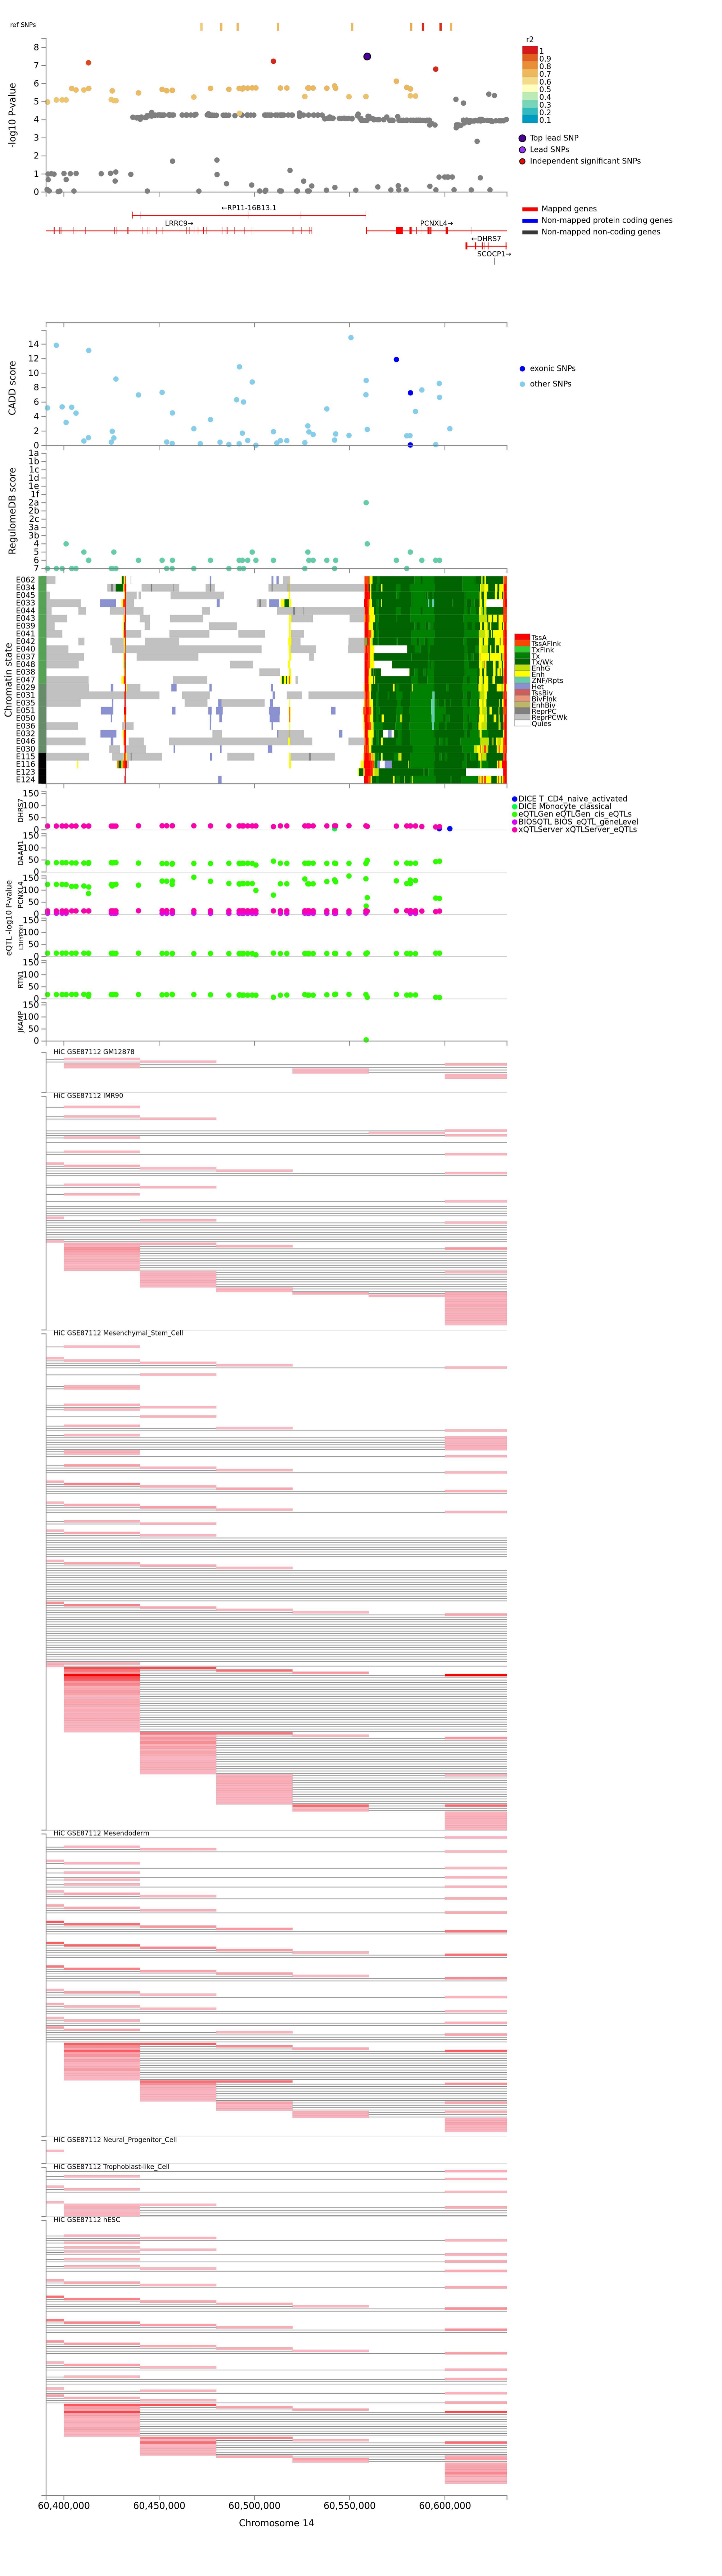

**Supplemental Figure 8. DRM regional association plot of donor chromosome 10 *ARID5B* region**

Regional plot of the chromosome 10 associated locus with, from the top, GWAS  $P$ -value (SNPs are colored based on  $r^2$ ), CADD score, RegulomeDB score and eQTL  $P$ -value across multiple datasets. eQTLs are plotted per gene and colored based on tissue types. In the plots of CADD score, RegulomeDB score and eQTLs, SNPs which are not in LD with the lead SNP are colored gray. 15-core chromatin states for Blood and T-cells are blood are shown with the states color-coded and shown in the legend at the far right. Significant Hi-C data loops across 21 tissues from GSE87112 are shown at the bottom, these are re-processed data (output of Fit-Hi-C) from <https://www.ncbi.nlm.nih.gov/geo/query/acc.cgi?acc=GSE87112>

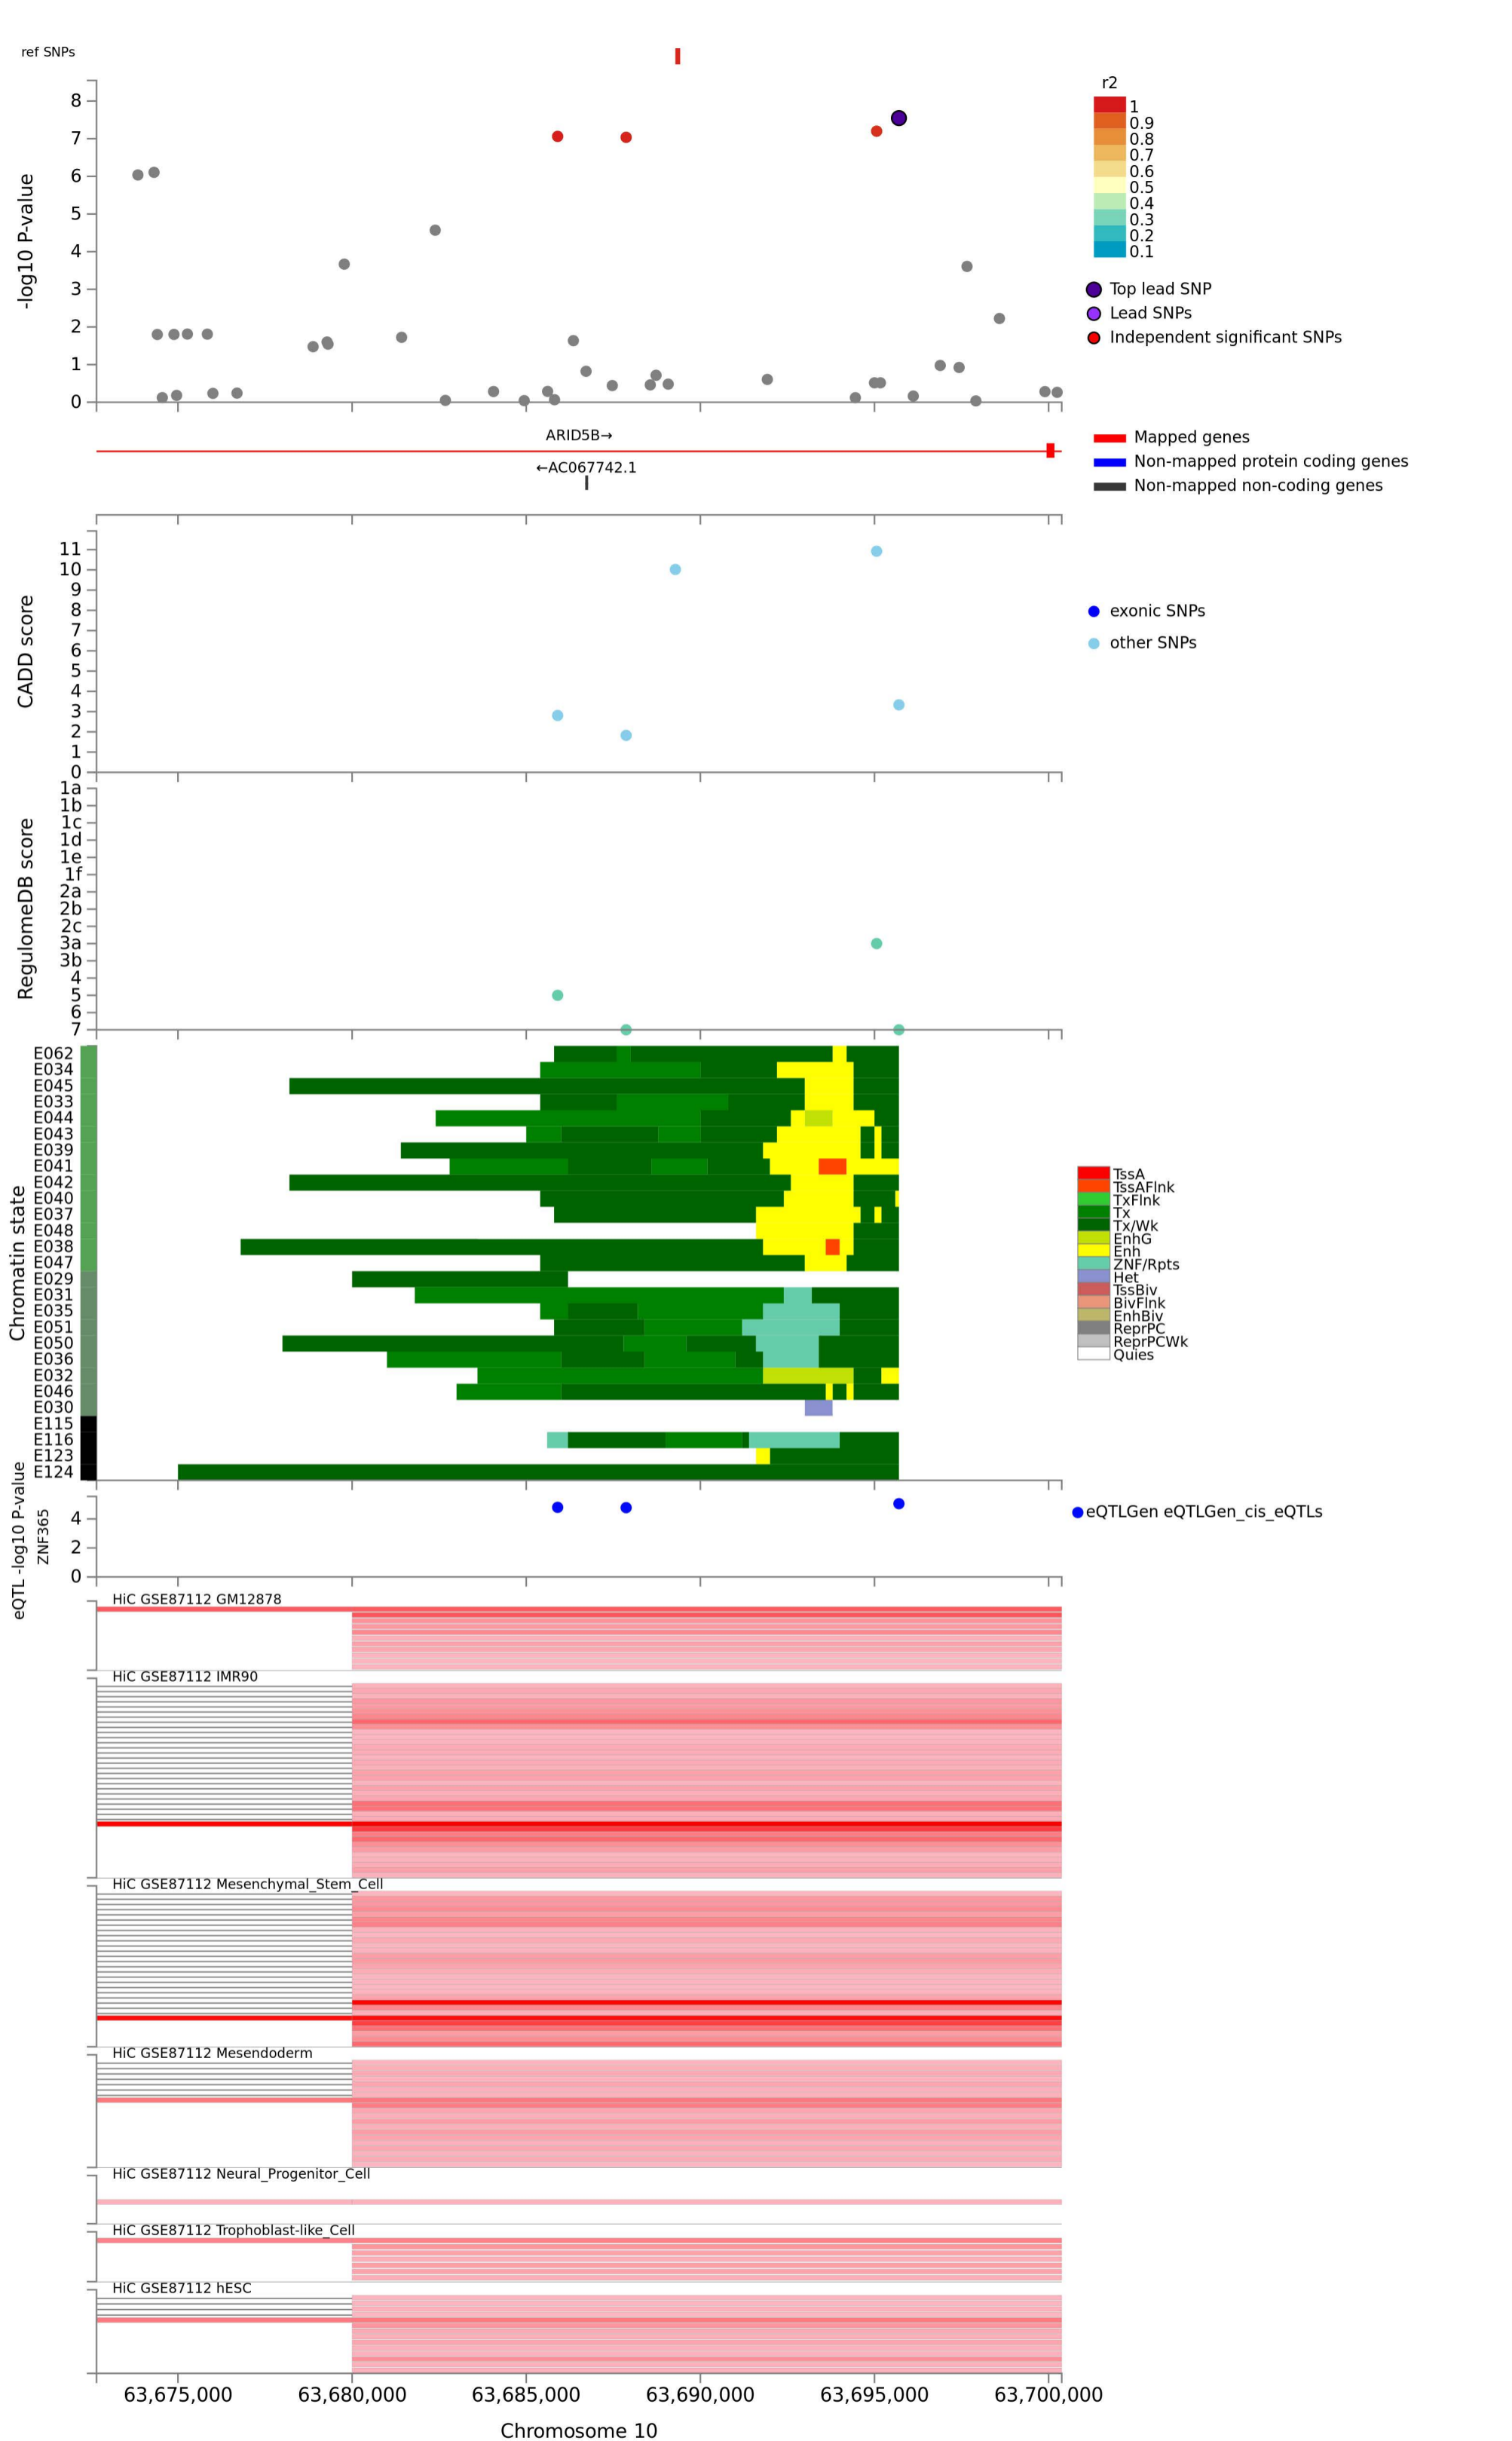

**Supplemental Figure 9. DRM regional association plot of donor chromosome 10 *LINC02628* region**

Regional plot of the chromosome 10 associated locus with, from the top, GWAS  $P$ -value (SNPs are colored based on  $r^2$ ), CADD score, RegulomeDB score and eQTL  $P$ -value across multiple datasets. eQTLs are plotted per gene and colored based on tissue types. In the plots of CADD score, RegulomeDB score and eQTLs, SNPs which are not in LD with the lead SNP are colored gray. 15-core chromatin states for Blood and T-cells are shown with the states color-coded and shown in the legend at the far right. Significant Hi-C data loops across 21 tissues from GSE87112 are shown at the bottom, these are re-processed data (output of Fit-Hi-C) from <https://www.ncbi.nlm.nih.gov/geo/query/acc.cgi?acc=GSE87112>

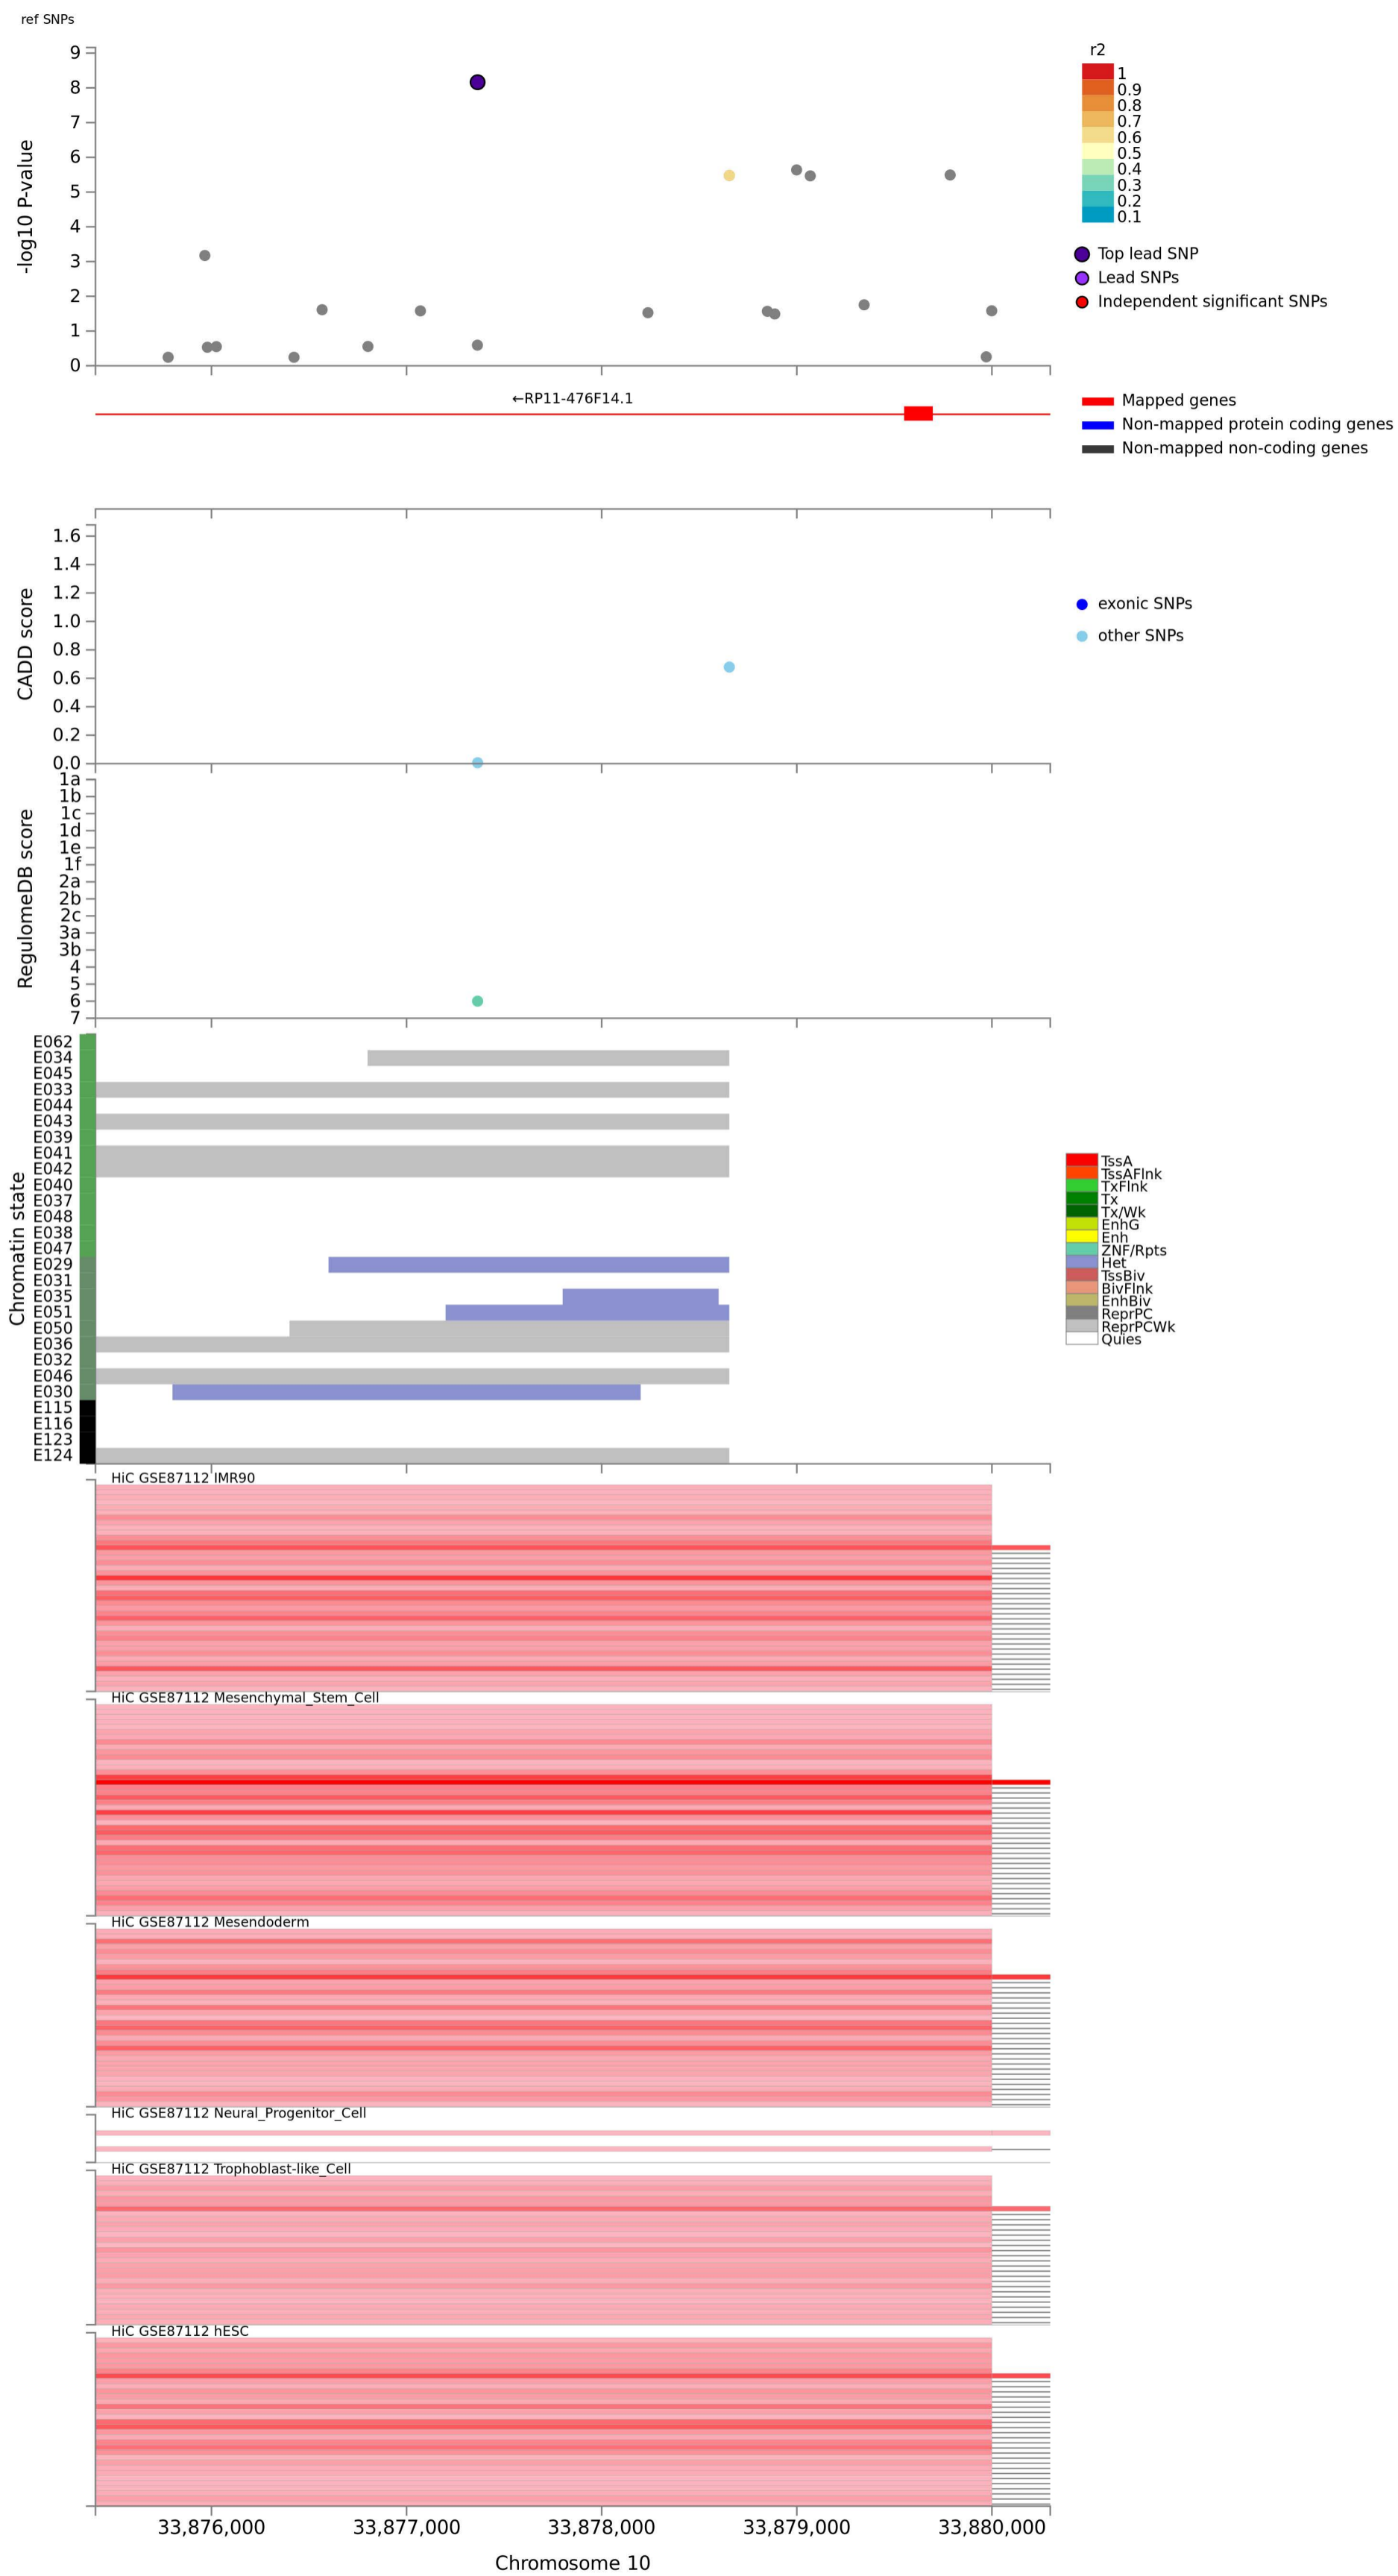

No eQTL of selected tissues exists in this region.

**Supplemental Figure 10. DRM Regional association plot of donor chromosome 5 CT49 region**

Regional plot of the chromosome 5 associated locus with, from the top, GWAS  $P$ -value (SNPs are colored based on  $r^2$ ), CADD score, RegulomeDB score and eQTL  $P$ -value across multiple datasets. eQTLs are plotted per gene and colored based on tissue types. In the plots of CADD score, RegulomeDB score and eQTLs, SNPs which are not in LD with the lead SNP are colored gray. 15-core chromatin states for Blood and T-cells are blood are shown with the states color-coded and shown in the legend at the far right. Significant Hi-C data loops across 21 tissues from GSE87112 are shown at the bottom, these are re-processed data (output of Fit-Hi-C) from <https://www.ncbi.nlm.nih.gov/geo/query/acc.cgi?acc=GSE87112>



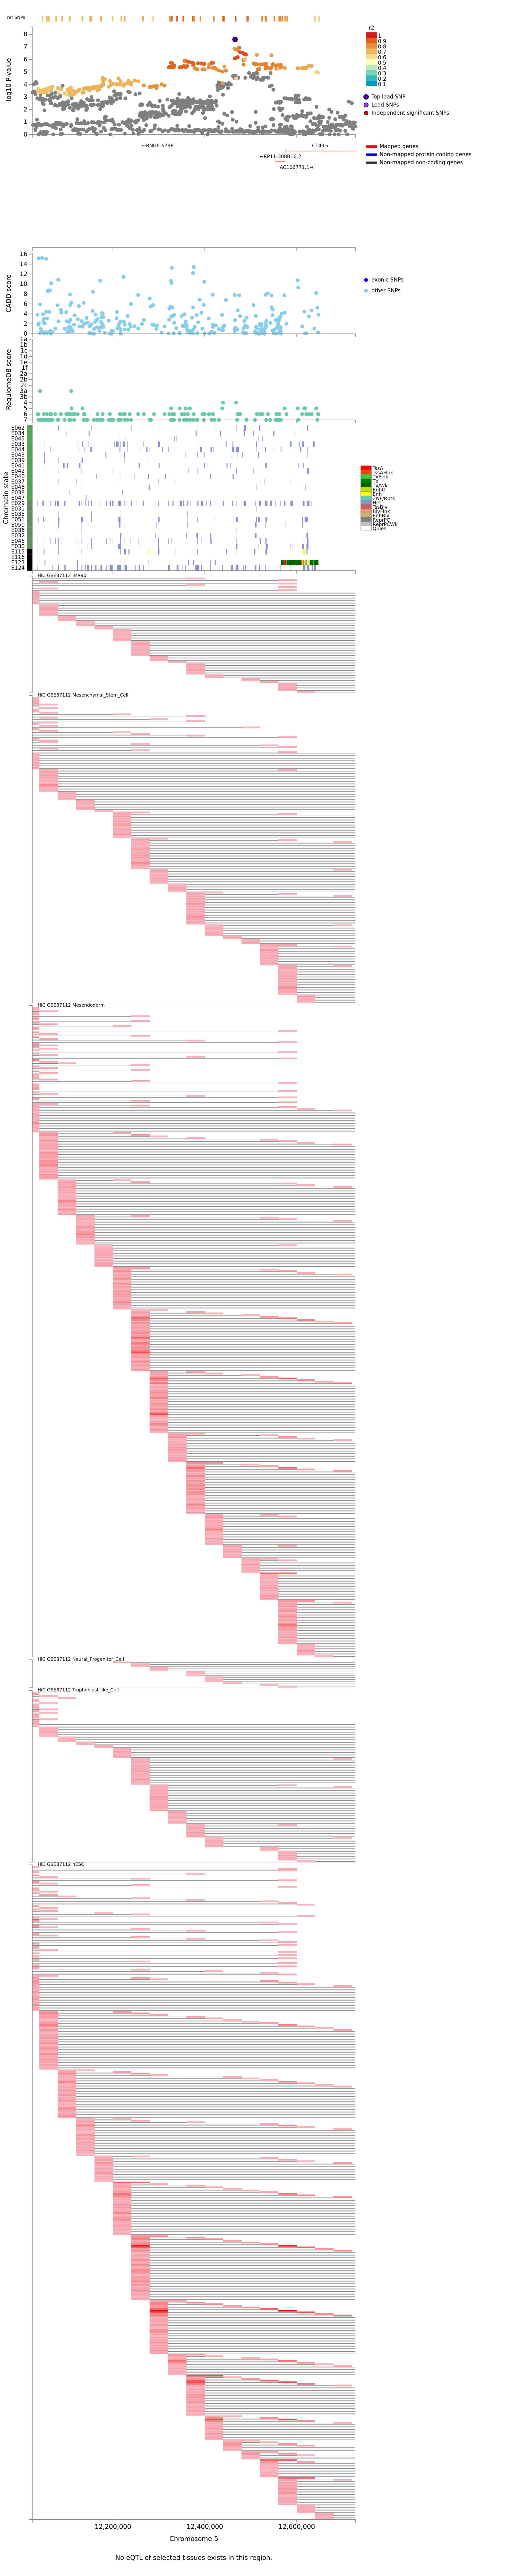

### Supplemental Figure 11. Q-Q plots of SNP association by cohort 1, cohort 2 and TRM

Observed p-values for all SNPs are plotted in grey against expected p-values for meta-analysis. From left to right, cohort 1, cohort 2 and meta-analysis. The top row are qqplots of p-values from recipient associations with TRM, the middle row are qqplots of p-values for donor associations with TRM, the bottom row are qqplots of p-values for donor-recipient mismatch associations with TRM.

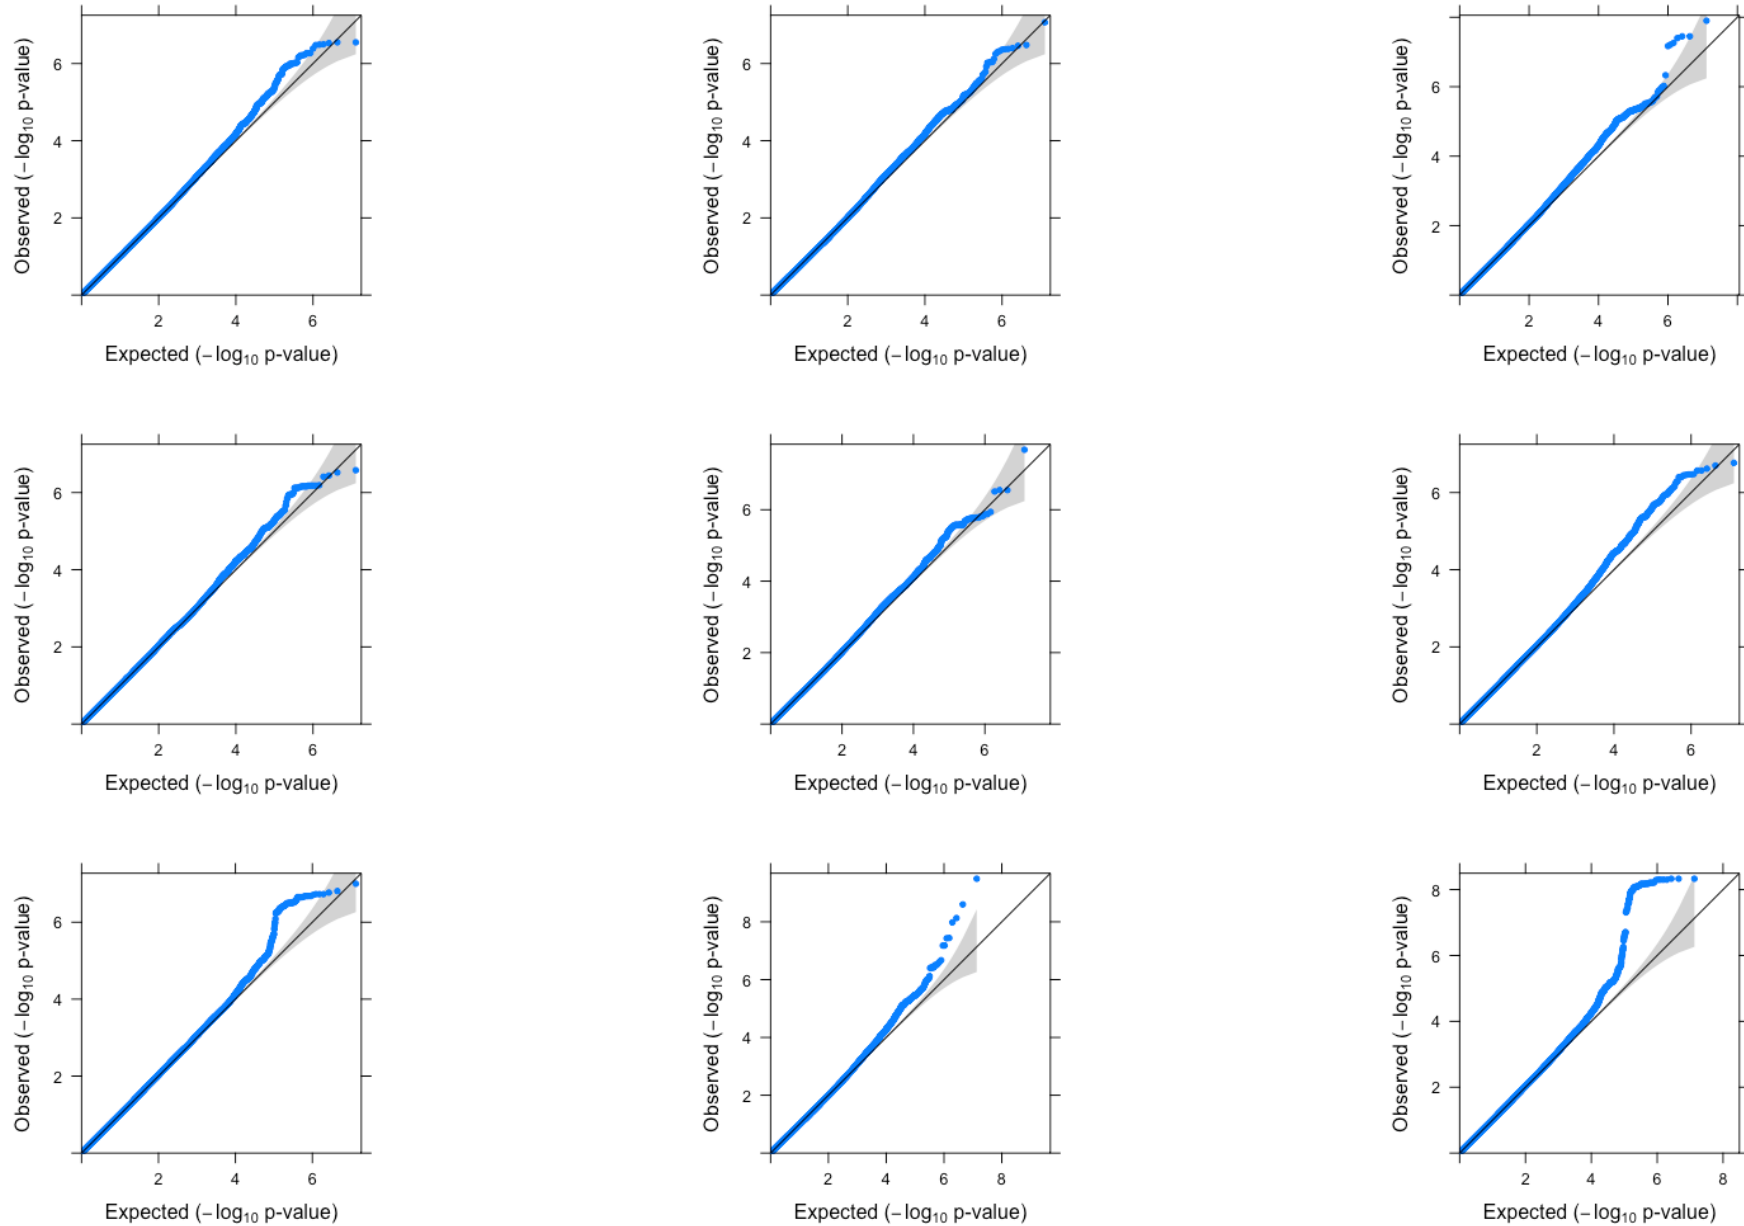

**Supplemental Figure 12. Cumulative incidence of TRM, and the competing risk DRM, by allele mismatches at SNP rs16858805 for A) Cohort 1, B) Cohort 2, C) both Cohorts combined.** Typed SNP rs16858805 is in perfect LD ( $r^2=1.0$ ) with imputed SNP rs75868097 in chromosome 4.

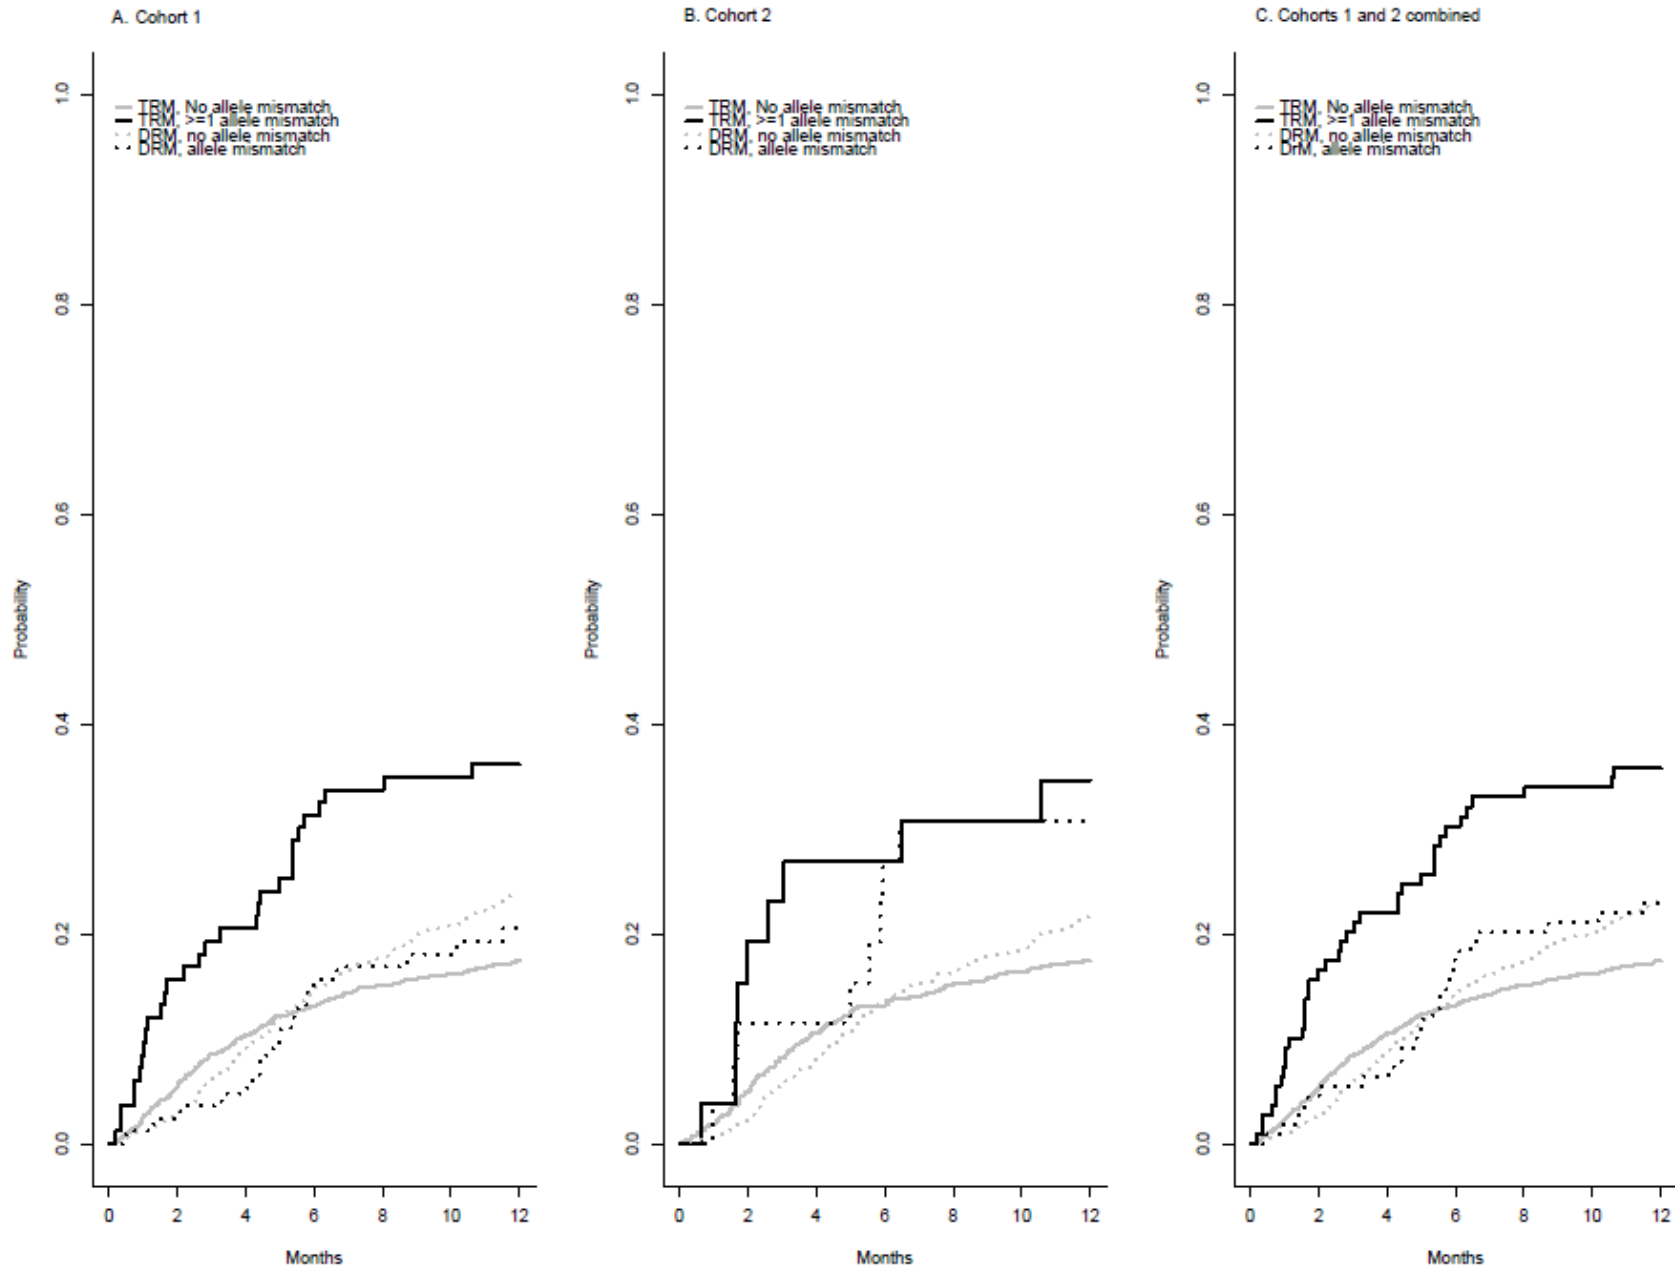

**Supplemental Figure 13. TRM regional association plot of recipient chromosome 7 *PILRB/PILRA* region**

Zoomed in regional plot of the chromosome 7 associated locus with, from the top, GWAS  $P$ -value (SNPs are colored based on  $r^2$ ), CADD score, RegulomeDB score and eQTL  $P$ -value across multiple datasets. eQTLs are plotted per gene and colored based on tissue types. In the plots of CADD score, RegulomeDB score and eQTLs, SNPs which are not in LD with the lead SNP are colored gray. 15-core chromatin states for Blood and T-cells are blood are shown with the states color-coded and shown in the legend at the far right. Significant Hi-C data loops across 21 tissues from GSE87112 are shown at the bottom, these are re-processed data (output of Fit-Hi-C) from

<https://www.ncbi.nlm.nih.gov/geo/query/acc.cgi?acc=GSE87112>

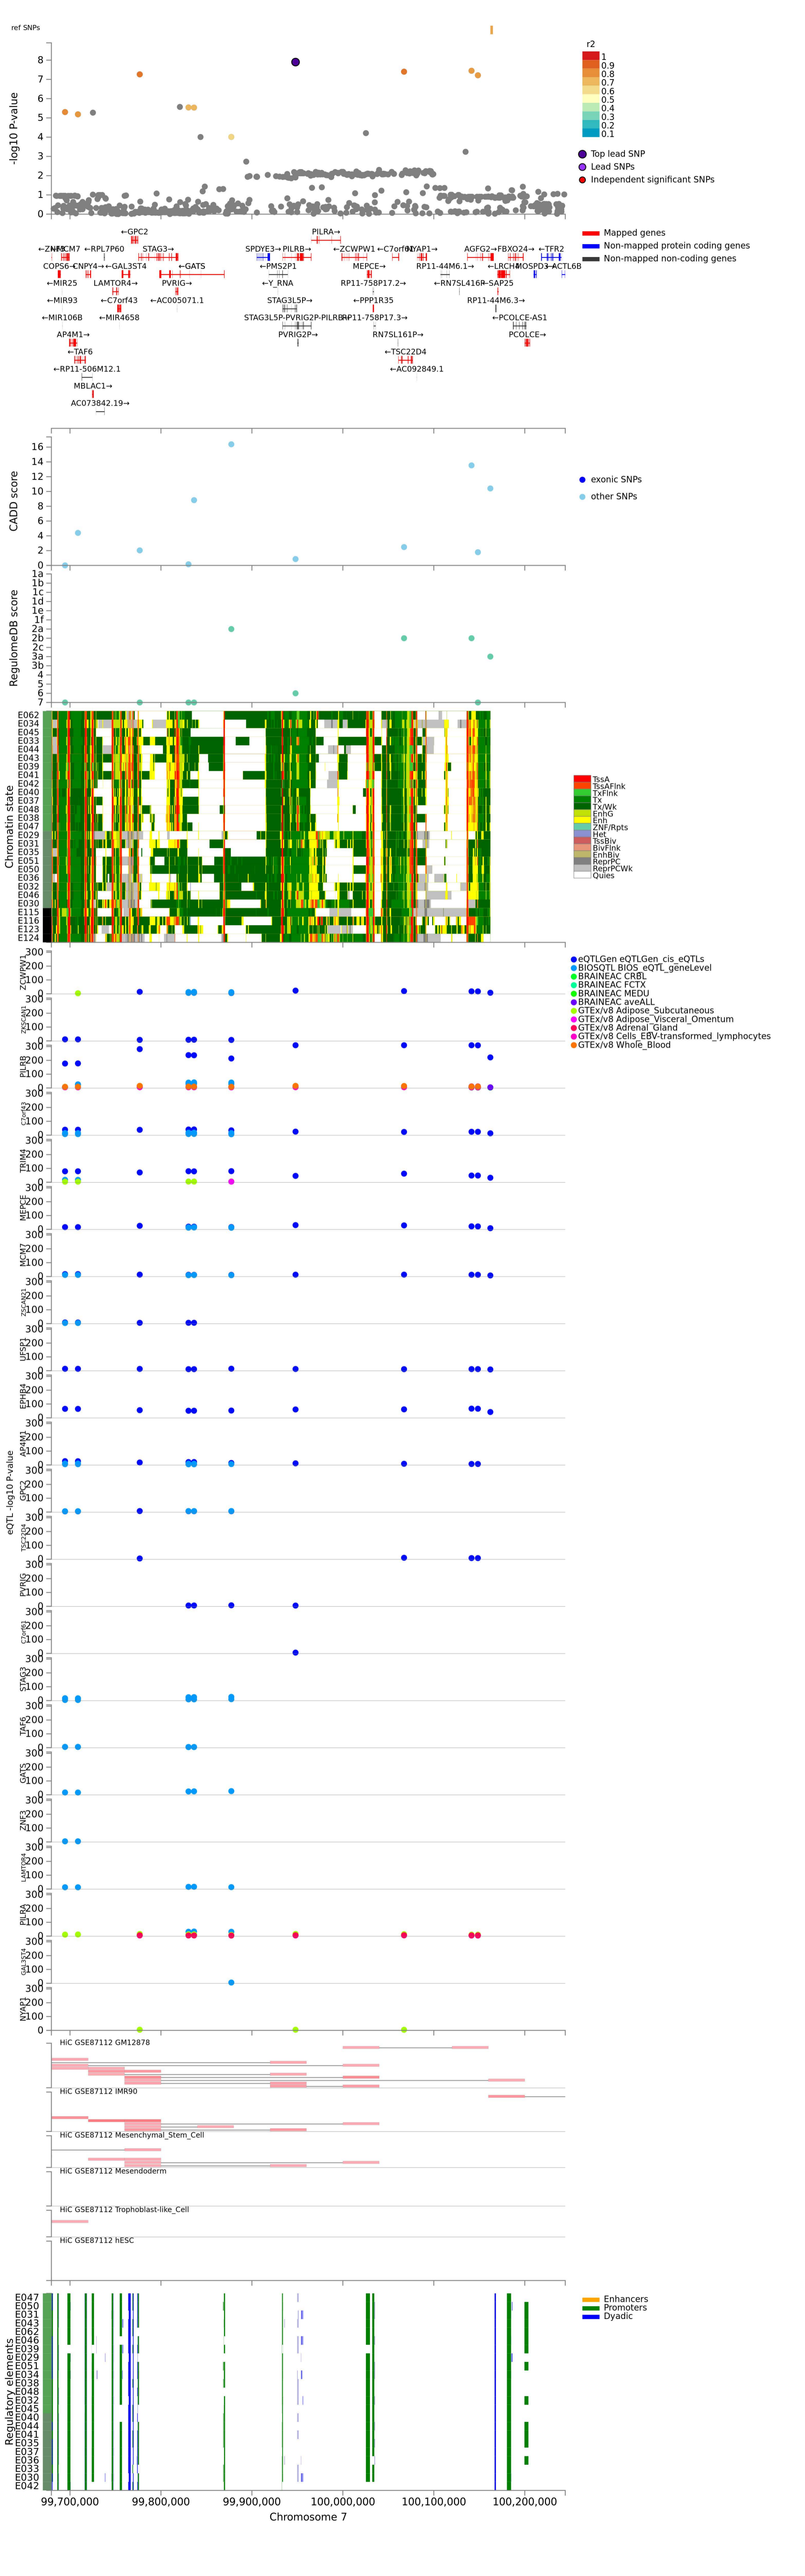

Supplement: mmc3.pdf [file mmc3.pdf]
